# Supplementary material for: Strengthening Expanded Program for Immunization Service Delivery through the Hayat mHealth Application: A Cross-Sectional Study in Upper and Lower Chitral, Pakistan
Source: Research Square preprint supplement (doi:10.21203/rs.3.rs-6828546/v1), 2025-06-16
Supplement: Supplementary file 1 [file 85266e53e22b2009b31a63e2.docx]

**Study ID: ________________________ Date of visit: _____________**

**Name of Healthcare facility (optional) _______________________________________________**

**District: _______________________ Union Council (UC): _____________________**

**Evaluator name(s): _______________________________________________________________**

**Respondent/vaccinator name (optional):** _________________________

***Note:*** *Select '****Yes****' only if the vaccinator is capable of performing the specified task within the application.*

**Registration**

1. Does the application facilitate the new registration of a child inside UC? Yes/No

2. Does the application facilitate the new registration of a child outside UC? Yes/No

**Defaulter**

1. Is the application capable of identifying children (navigation) who are the defaulters of the vaccination? Yes/No

2. Does the application assist in addressing the vaccination coverage for children who have missed their appointments? Yes/No

**Stock**

1. Have the vaccinators received training in stock management (in and out stock training)? Yes/No

2. Does the application include a feature for managing stock returns or wastage after opening a vial of BCG or TCV, etc.? Yes/No

3. Is the vaccinator able to stock in the application with batch number and expiry? Yes/No

**Technical**

1. Is the vaccinator able to sync data from the application to the server? Yes/No

2. Is the vaccinator able to share data with/without an internet connection? Yes/No

3. Is the vaccinator able to assign or reassign the QR code of the registered child/woman? Yes/No

4. Is the vaccinator able to record the reason why a child is not vaccinated? Yes/No

5. Is the vaccinator able to merge records of children/women? Yes/No

**User Satisfaction**

1. Does the application provide a user-friendly interface for the vaccinator? Yes/No

2. Are you satisfied with the experience of using the application? Yes/No

Data collection sheet for accuracy of vaccination data for children 0-11 months for the period Feb-March 2024

**VERIFICATION OF ESSENTIAL VACCINATIONS FOR CHILDREN AT THE HEALTH UNIT**

**Study ID:** _________________ **District:** _____________________ **UC:** _______________________ **Date of the visit:** _________________

**Name of Healthcare facility (optional) _______________________________________________**

**Respondent/vaccinator (optional):** ______________________ **Evaluator name (s):** ______________________________________________

| **Questions** | | **Jan** | **Feb** | **Mar** | **Comments** |
| --- | --- | --- | --- | --- | --- |
| 1 | Number of children vaccinated with **BCG** recounted from daily register |  |  |  |  |
|  |  |  |  |
| 2 | Number of children vaccinated with **Penta 1** recounted from daily register |  |  |  |  |
|  |  |  |  |
| 3 | Number of children vaccinated with **Penta 2** recounted from daily register |  |  |  |  |
|  |  |  |  |
| 4 | Number of children vaccinated with **Penta 3** recounted from daily register |  |  |  |  |
|  |  |  |  |
| 5 | Number of children vaccinated with **MR 1** recounted from daily register |  |  |  |  |
|  |  |  |  |
| 1 | Number of children vaccinated with **BCG** recounted from Hayat mobile report |  |  |  |  |
|  |  |  |  |
| 2 | Number of children vaccinated with **Penta 1** recounted from Hayat mobile report |  |  |  |  |
|  |  |  |  |
| 3 | Number of children vaccinated with **Penta 2** recounted from Hayat mobile report |  |  |  |  |
|  |  |  |  |
| 4 | Number of children vaccinated with **Penta 3** recounted from Hayat mobile report |  |  |  |  |
|  |  |  |  |
| 5 | Number of children vaccinated with **MR 1** recounted from Hayat mobile report |  |  |  |  |
|  |  |  |  |
|  | **Target children aged less than 1 year**. If this is not known, please get number of Penta1 vaccinations provided to children aged less than 1 year. | | | | |

- In case of missing information/reports, record the missed information and reason in the comments.

**Data collection sheet for all six vaccinations at the health unit for children for the period Jan-Mar 2024**

The child's manual vaccination record (vaccination card) will be compared with the data (report) in the Hayat mHealth application. Any discrepancies where vaccinations recorded on the **vaccination card (VC)** are not documented in the **Hayat application (A)** will be identified and noted. For example, if a child has received all essential vaccinations according to the routine immunization schedule, as recorded on the VC, this information will be cross-referenced with the data in the A and marked as **Yes/No**.

***Note:*** *Please write "****Not Applicable (NA)****" if a child is not yet eligible to receive a particular vaccine.*

**Study ID:** _________________ **District:** _____________________ **UC:** _______________________ **Date of the visit:** _________________

**Name of Healthcare facility (optional) _______________________________________________**

**Respondent/vaccinator (optional):** ______________________ **Evaluator name (s):** ______________________________________________

| S.no. | Child’s Name | Father Name | Date of birth | Child vaccination registration number | BCG (VC) | BCG (A) | Penta 1 (VC) | Penta 1 (A) | Penta 2 (VC) | Penta 2 (A) | Penta 3 (VC) | Penta 3 (A) | MR 1 (VC) | MR 1 (A) | MR 2 (VC) | MR 2 (A) | Comments  (If any of the vaccine are not verified through the application, name here) |
| --- | --- | --- | --- | --- | --- | --- | --- | --- | --- | --- | --- | --- | --- | --- | --- | --- | --- |
| 1 |  |  |  |  |  |  |  |  |  |  |  |  |  |  |  |  |  |
| 2 |  |  |  |  |  |  |  |  |  |  |  |  |  |  |  |  |  |
| 3 |  |  |  |  |  |  |  |  |  |  |  |  |  |  |  |  |  |
| 4 |  |  |  |  |  |  |  |  |  |  |  |  |  |  |  |  |  |
